# Supplementary material for: Skin-Resident γδ T Cells Exhibit Site-Specific Morphology and Activation States
Source: Hindawi journal article supplement (doi:10.1155/2019/9020234), 2019-01-06
Supplement: f1 [file 9020234.f1.pdf]

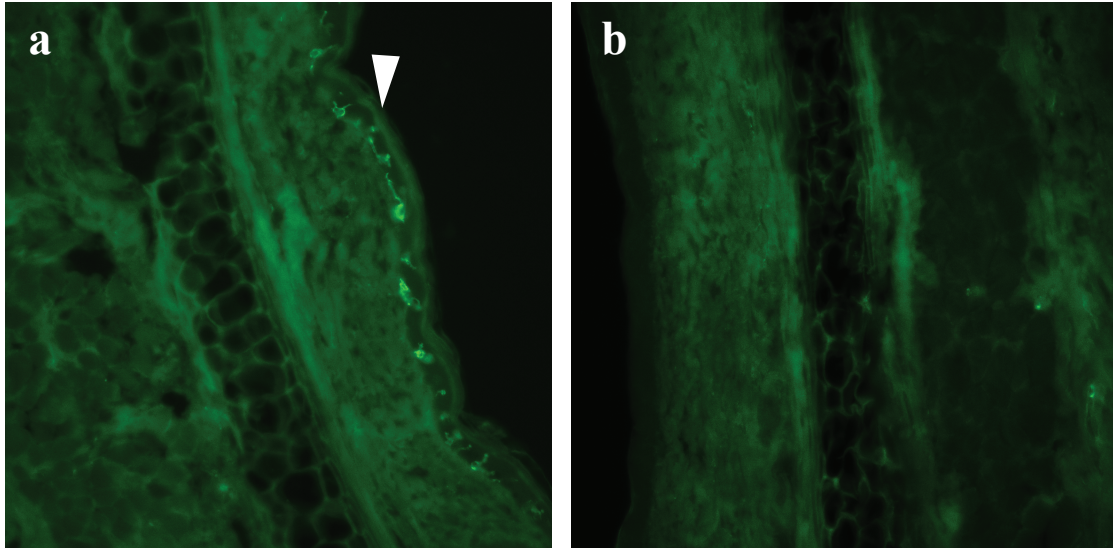

**Supplemental Figure 1.** Specificity of immunostaining for TCR $\delta$  was confirmed using sections of ears from wild-type TCR $\delta$ <sup>+/+</sup> and TCR $\delta$ <sup>-/-</sup> (knockout) mice. While  $\gamma\delta$  T cells are observed in the epidermal layer in wild-type mice (a; arrow), the cells are absent in sections from knockout mice (b).
